# Supplementary material for: Nanoporous TiN/TiO2/Alumina Membrane for Photoelectrochemical Hydrogen Production from Sewage Water
Source: MDPI journal article supplement (doi:10.3390/nano11102617), 2021-10-06
Supplement: s1 [file s1]

Supplementary Data

# Nanoporous TiN/TiO<sub>2</sub>/Alumina Membrane for Photoelectrochemical Hydrogen Production from Sewage Water

Abdullah Almohammed<sup>1</sup>, Mohamed Shaban<sup>1,\*</sup>, Huda Mostafa<sup>2</sup>, and Mohamed Rabia<sup>2,3</sup>

<sup>1</sup> Department of Physics, Faculty of Science, Islamic University in Madinah, Al-Madinah Al-Munawarah, 42351, Saudi Arabia; ard.almohammed@hotmail.com

<sup>2</sup> Nanophotonics and Applications (NPA) Lab, Physics Department, Faculty of Science, Beni-Suef University, Beni-Suef, 62514, Egypt; hudamostafa55@gmail.com (H.M.); mohamedchem@science.bsu.edu.eg (M.R.)

<sup>3</sup> Polymer Research Laboratory, Chemistry Department, Faculty of Science, Beni-Suef University, Beni-Suef 62511, Egypt

\* Correspondence: mssfadel@aucegypt.edu

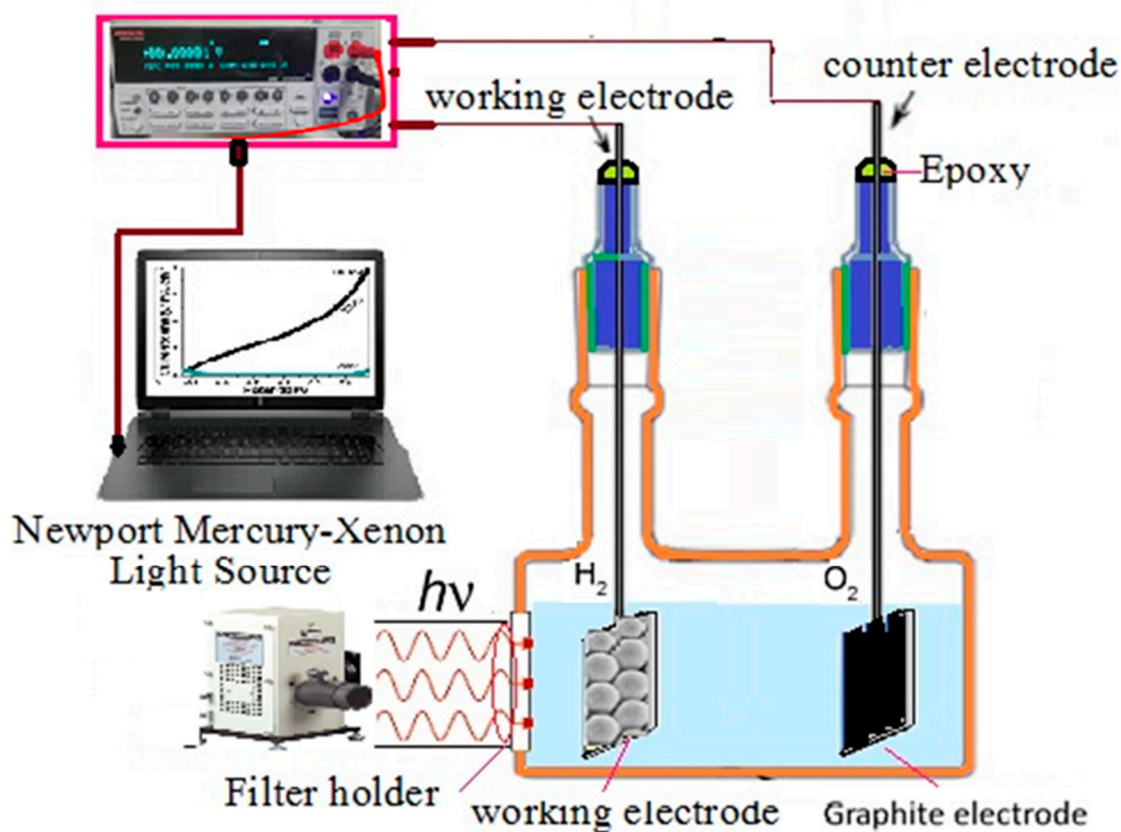

Figure S1. Testing the prepared materials as a photocathode.

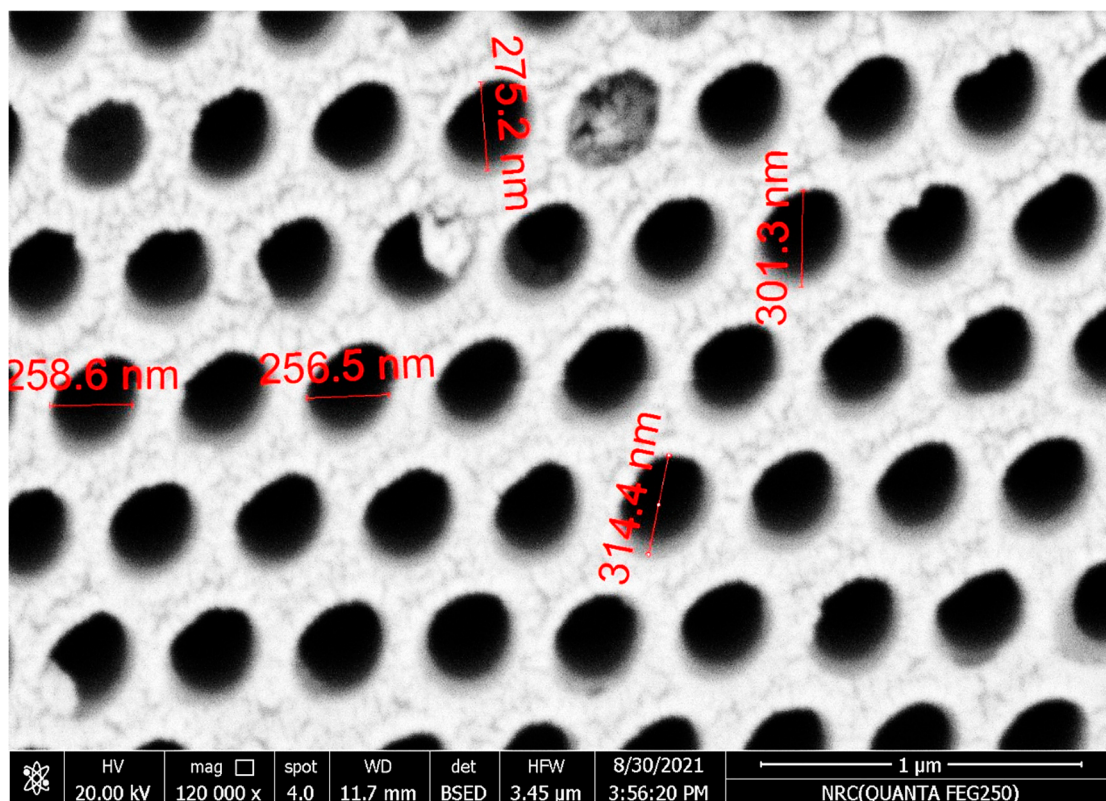

Figure S2. SEM image of Au/TiN/TiO<sub>2</sub>/Al<sub>2</sub>O<sub>3</sub>.

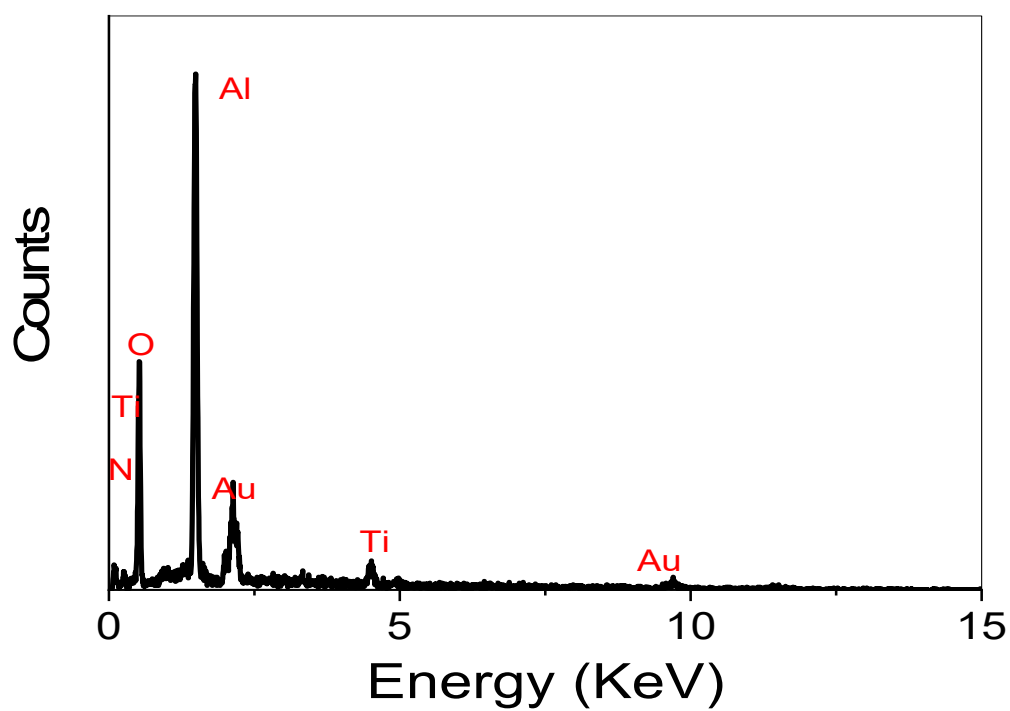

Figure S3. EDX of Au/TiN/TiO<sub>2</sub>/Al<sub>2</sub>O<sub>3</sub>.

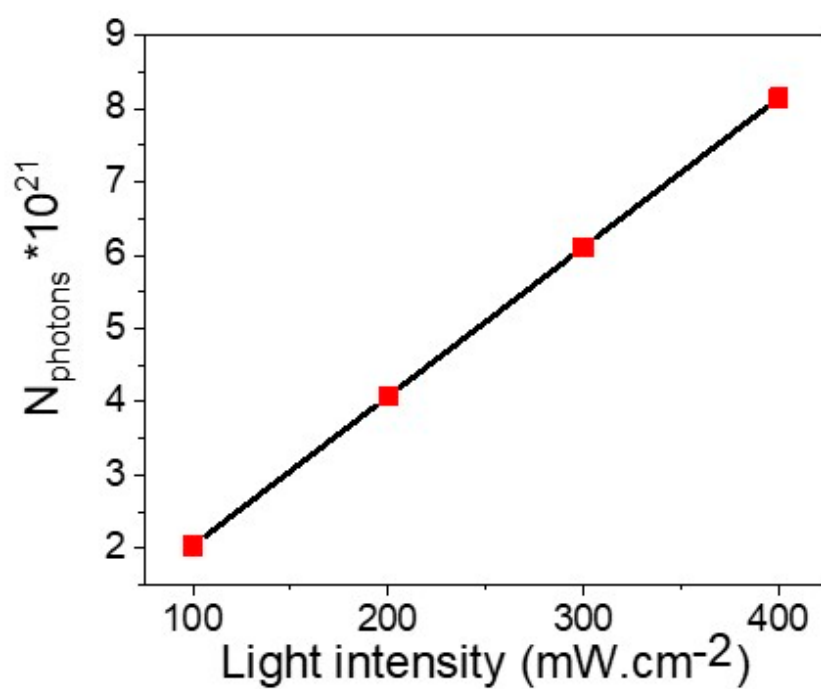

Figure S4. The relation between the number of photons per second and the incident light intensity.

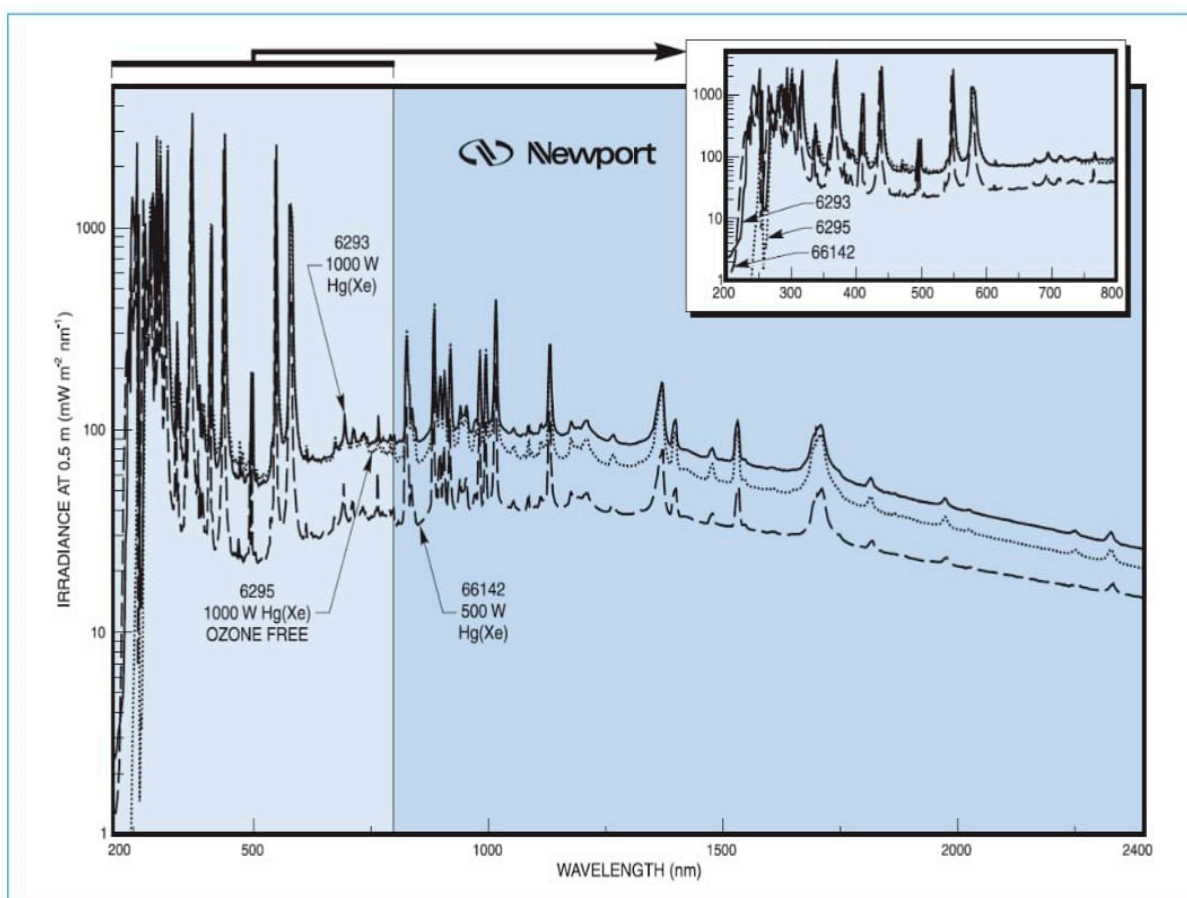

Figure S5. Irradiance spectrum of 66142 500 W Hg(Xe) lamp.

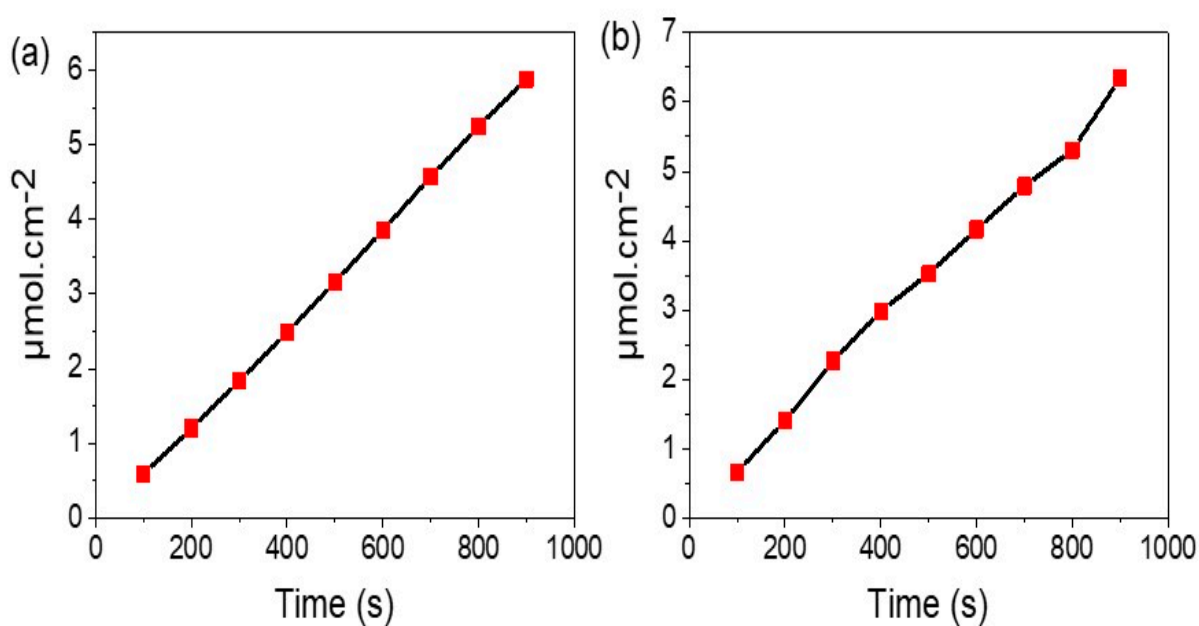

**Figure S6.** The number of moles evolved (a)  $\text{H}_2$  and (b)  $\text{O}_2$  gas.

**Table S1.** The chemical composition of the sewerage water used for the  $\text{H}_2$  generation.

| Material or element | Concentration (mg/L)   |
|---------------------|------------------------|
| Phenols             | 0.015                  |
| $\text{F}^-$        | 1.0                    |
| $\text{Al}^{3+}$    | 3.0                    |
| $\text{NH}_3$       | 5.0                    |
| $\text{Hg}^{2+}$    | 0.005                  |
| $\text{Pb}^{2+}$    | 0.5                    |
| $\text{Cd}^{3+}$    | 0.05                   |
| $\text{As}^{3+}$    | 0.05                   |
| $\text{Cr}^{3+}$    | 1.0                    |
| $\text{Cu}^{2+}$    | 1.5                    |
| $\text{Ni}^{3+}$    | 0.1                    |
| $\text{Fe}^{3+}$    | 1.5                    |
| $\text{Mn}^{2+}$    | 1.0                    |
| $\text{Zn}^{2+}$    | 5.0                    |
| $\text{Ag}^+$       | 0.1                    |
| $\text{Ba}^{3+}$    | 2.0                    |
| $\text{Co}^{2+}$    | 2.0                    |
| Other cations       | 0.1                    |
| Pesticides          | 0.2                    |
| $\text{CN}^-$       | 0.1                    |
| Industrial washing  | 0.5                    |
| Coli groups         | 4000/100 $\text{cm}^3$ |

---

### Determination of $\Delta H^*$ and $\Delta S^*$ values

In the same manner, the enthalpy ( $\Delta H^*$ ) and entropy ( $\Delta S^*$ ) can be estimated from the Eyring equation, Equations S1 and S2, using the Boltzmann constant ( $k_B$ ) and Planck constant ( $h$ ).

$$k = T \cdot \frac{k_B}{h} \cdot e^{\Delta S/R} \cdot e^{-\Delta H/RT} \quad (S1)$$

$$\ln\left(\frac{k}{T}\right) = \ln\frac{k_B}{h} + \frac{\Delta S}{R} - \frac{\Delta H}{RT} \quad (S2)$$

For calculation  $\Delta H^*$ , we have to plot the relation between  $\ln(k/T)$  and  $1/T$ , from the slope value, we can determine the  $\Delta H^*$  value. From the same relation,  $\Delta S^*$  value can be determined from the intercept, in which the intercept value equal  $\ln\frac{k_B}{h} + \frac{\Delta S}{R}$ .

For calculating the  $\Delta H^*$  and  $\Delta S^*$  values, the slope, and intercept from Figure 8 (e, f) are used. The values of  $\Delta H^*$  for TiN/TiO<sub>2</sub>/Al<sub>2</sub>O<sub>3</sub> and Au/TiN/TiO<sub>2</sub>/Al<sub>2</sub>O<sub>3</sub> electrodes are 24.26 and 15.77 J.mol<sup>-1</sup>, respectively, while  $\Delta S^*$  values are 238.1 and 211.5 J.K<sup>-1</sup>.mol<sup>-1</sup>.
